# Supplementary material for: A Novel Technique to Detect EGFR Mutations in Lung Cancer
Source: MDPI journal article supplement (doi:10.3390/ijms17050792), 2016-05-23
Supplement: s1 [file s1]

## Supplementary Materials: A Novel Technique to Detect *EGFR* Mutations in Lung Cancer

Yuanbin Liu, Ting Lei, Zhiyu Liu, Yanbin Kuang, Jianxin Lyu and Qi Wang

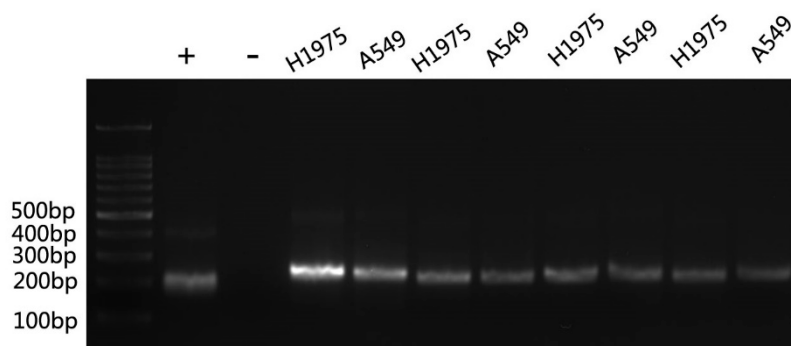

**Figure S1.** Primer set without PNA for detecting the L858R mutation in 10 min.

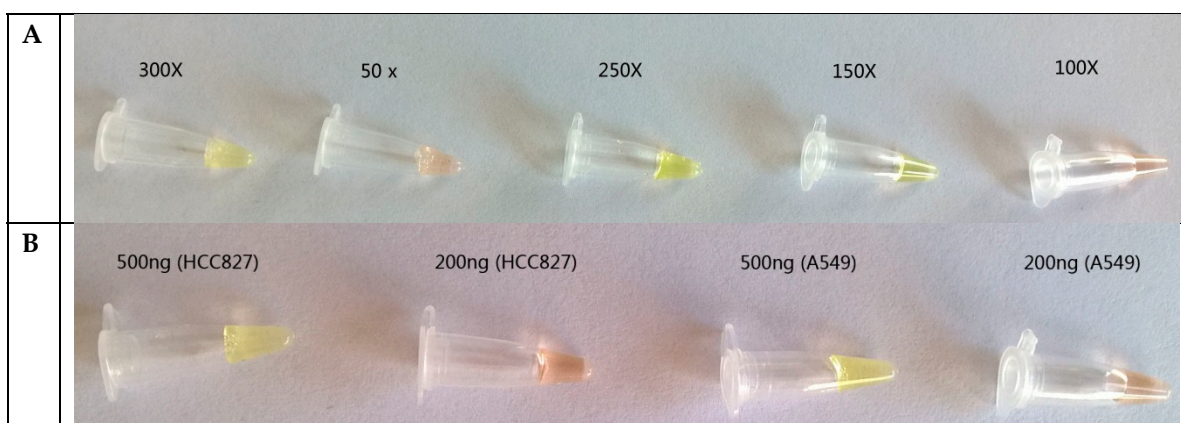

**Figure S2.** (A) Optimization of the SYBR detection system. The products of the ARPS system for detecting the *EGFR*L858R mutation in the HCC827 cell line (300ng DNA), which harbors the 19Del mutation, in 15 min. From left to right, the concentration of SYBR was 1  $\mu$ L of 300 $\times$ , 50 $\times$ , 250 $\times$ , 150 $\times$ , and 100 $\times$  per 20  $\mu$ L of product. We chose 1  $\mu$ L of 200 $\times$  SYBR per 20  $\mu$ L of RPA product for the experiment; (B) Optimization of the SYBR detection system. The concentration of SYBR was 1  $\mu$ L of 200 $\times$  SYBR per 20  $\mu$ L of RPA product. The products of the ARPS system for detecting the *EGFR*L858R mutation in the HCC827 cell line (500 ng/200 ng DNA) and the A549 cell line (500 ng/200 ng DNA) in 15 min. We chose 300 ng of template as in the experiment shown in Figure S1.
